# Supplementary material for: Real‐World Clinical Outcomes in Patients with Locally Advanced or Metastatic Merkel Cell Carcinoma Treated in U.S. Oncology Clinical Practices: Results from SPEAR‐Merkel
Source: PubMed Central journal article supplement — Oncologist. 2021 Jul 2;26(9):e1633–43. doi: 10.1002/onco.13845 (PMC8417847; doi:10.1002/onco.13845), 2021-07-02
Supplement: ONCO-26-e1633-s001.pdf [file ONCO-26-e1633-s001.pdf]

Supplemental Table for:  
Real-World Clinical Outcomes in Locally Advanced or Metastatic Merkel Cell Carcinoma Patients in the United States: Results From SPEAR-Merkel  
Abhijeet Bhanegaonkar et al.

**Supplementary Table:** Immunosuppressive medications within 28 days prior to the initiation of 1L treatment or during follow-up

| <b>Immunosuppressive Medications</b> |                                  |                                               |
|--------------------------------------|----------------------------------|-----------------------------------------------|
| abatacept                            | dexamethasone >1 mg per day      | mycophenylate                                 |
| abatacept-maltose                    | eculizumab                       | natalizumab                                   |
| adalimumab                           | etanercept                       | ofatumumab                                    |
| alemtuzumab                          | everolimus                       | penicillamine                                 |
| anakinra                             | FK506, tacrolimus                | pentostatin                                   |
| ATG (anti thymocyte globulin)        | fludarabine                      | prednisolone >10 mg per day                   |
| azathioprine                         | golimumab                        | prednisone >10 mg per day                     |
| basiliximab                          | hydrocortisone >40mg per day     | rituximab                                     |
| belatacept                           | hydroxychloroquine               | secukinumab (anti-IL17A)                      |
| belimumab                            | infliximab                       | sirolimus                                     |
| betamethasone >1 mg per day          | melphalan                        | sulfasalazine                                 |
| certolizumab                         | mercaptopurine                   | temsirolimus                                  |
| certolizumab pegol                   | methotrexate                     | thalidomide                                   |
| chlorambucil                         | methylprednisolone >8 mg per day | tocilizumab (anti-IL6 receptor)               |
| cladribine                           | muromonab-CD3 (Orthoclone OKT3)  | tofacitinib (oral; jak 1 and jak 3 inhibitor) |

|                  |                                       |                             |
|------------------|---------------------------------------|-----------------------------|
| cyclophosphamide | mycophenolate mofetil (MMF, CellCept) | triamcinolone >8 mg per day |
| cyclosporine     | mycophenolate sodium (Myfortic)       | Vedolizumab                 |
| Daclizumab       | mycophenolic acid                     |                             |
